# Supplementary material for: Vacuum ultraviolet second-harmonic generation in NH4B4O6F crystal
Source: Research Square preprint supplement (doi:10.21203/rs.3.rs-6284969/v1), 2025-04-07
Supplement: Supplementary file 1 [file 8f9696f1d15a1e05f540677d.docx]

**Vacuum ultraviolet second-harmonic generation in NH4B4O6F crystal**

Fangfang Zhang1,2†, Zilong Chen1†, Chen Cui1†, Zhihua Yang1,2, Miriding Mutailipu1,2, Fuming Li1, Xueling Hou1, Xifa Long1, Shilie Pan1,2*

1CAS Key Laboratory of Functional Materials and Devices for Special Environmental Conditions; Xinjiang Key Laboratory of Functional Crystal Materials; Xinjiang Technical Institute of Physics and Chemistry, Chinese Academy of Sciences, Urumqi 830011, China.

2Center of Materials Science and Optoelectronics Engineering, University of Chinese Academy of Sciences, Beijing 100049, China.

*Corresponding author. Email: slpan@ms.xjb.ac.cn.

†These authors contributed equally to this work.

**Extended Data Fig. 1.** **Schematic diagram of the enhancement of interlayer coupling through the insertion of atoms with spatially extended s-orbitals between neighboring layers.** It illustrates the modified hopping parameter and the resulting increase in bonding strength, which enables the growth of crystals with reduced layered tendency.

**Extended Data Fig. 2. Comparison of the effective NLO coefficients (*d*eff) between ABF and KBBF at fundamental wavelength range of 310-400 nm.** For type I phase-matching, *d*eff (ABF) = *d*32cos*φ*, where *d*32 = 1.09 pm V–1 based on the Maker fringe technique, and *d*eff (KBBF) = *d*11cos*θ*cos*3φ*, where *d*11 = 0.49 pm V–1 (*32*). The phase-matching angle (*θ*) and azimuthal angle (*φ*) were calculated based on the Sellmeier equations for ABF and KBBF, respectively. The weak dependence of *d*ij on wavelength where far from cut-off edge was ignored. *d*eff at 386→193 nm and 355→177.3 nm is highlighted by dot lines.


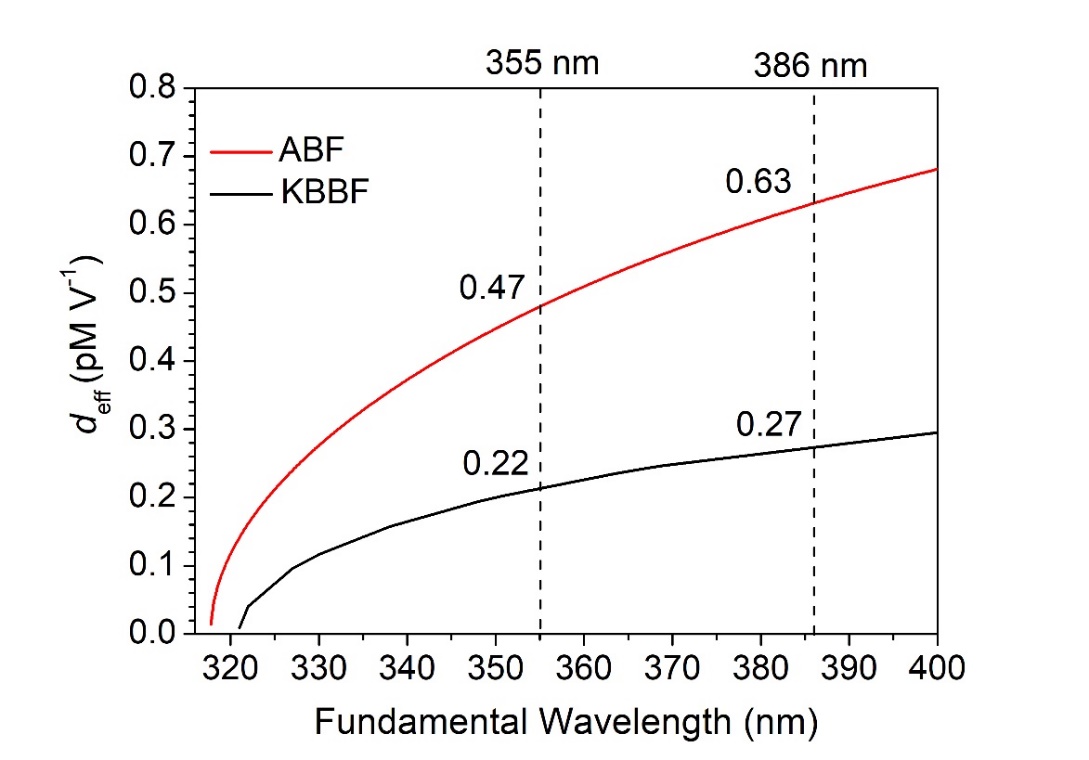


**Extended Data Fig. 3. Raw data of frequency doubling light for 158.9-188.0 nm using the ABF device with (*θ*, *φ*) = (0 °, 70 °).**

**
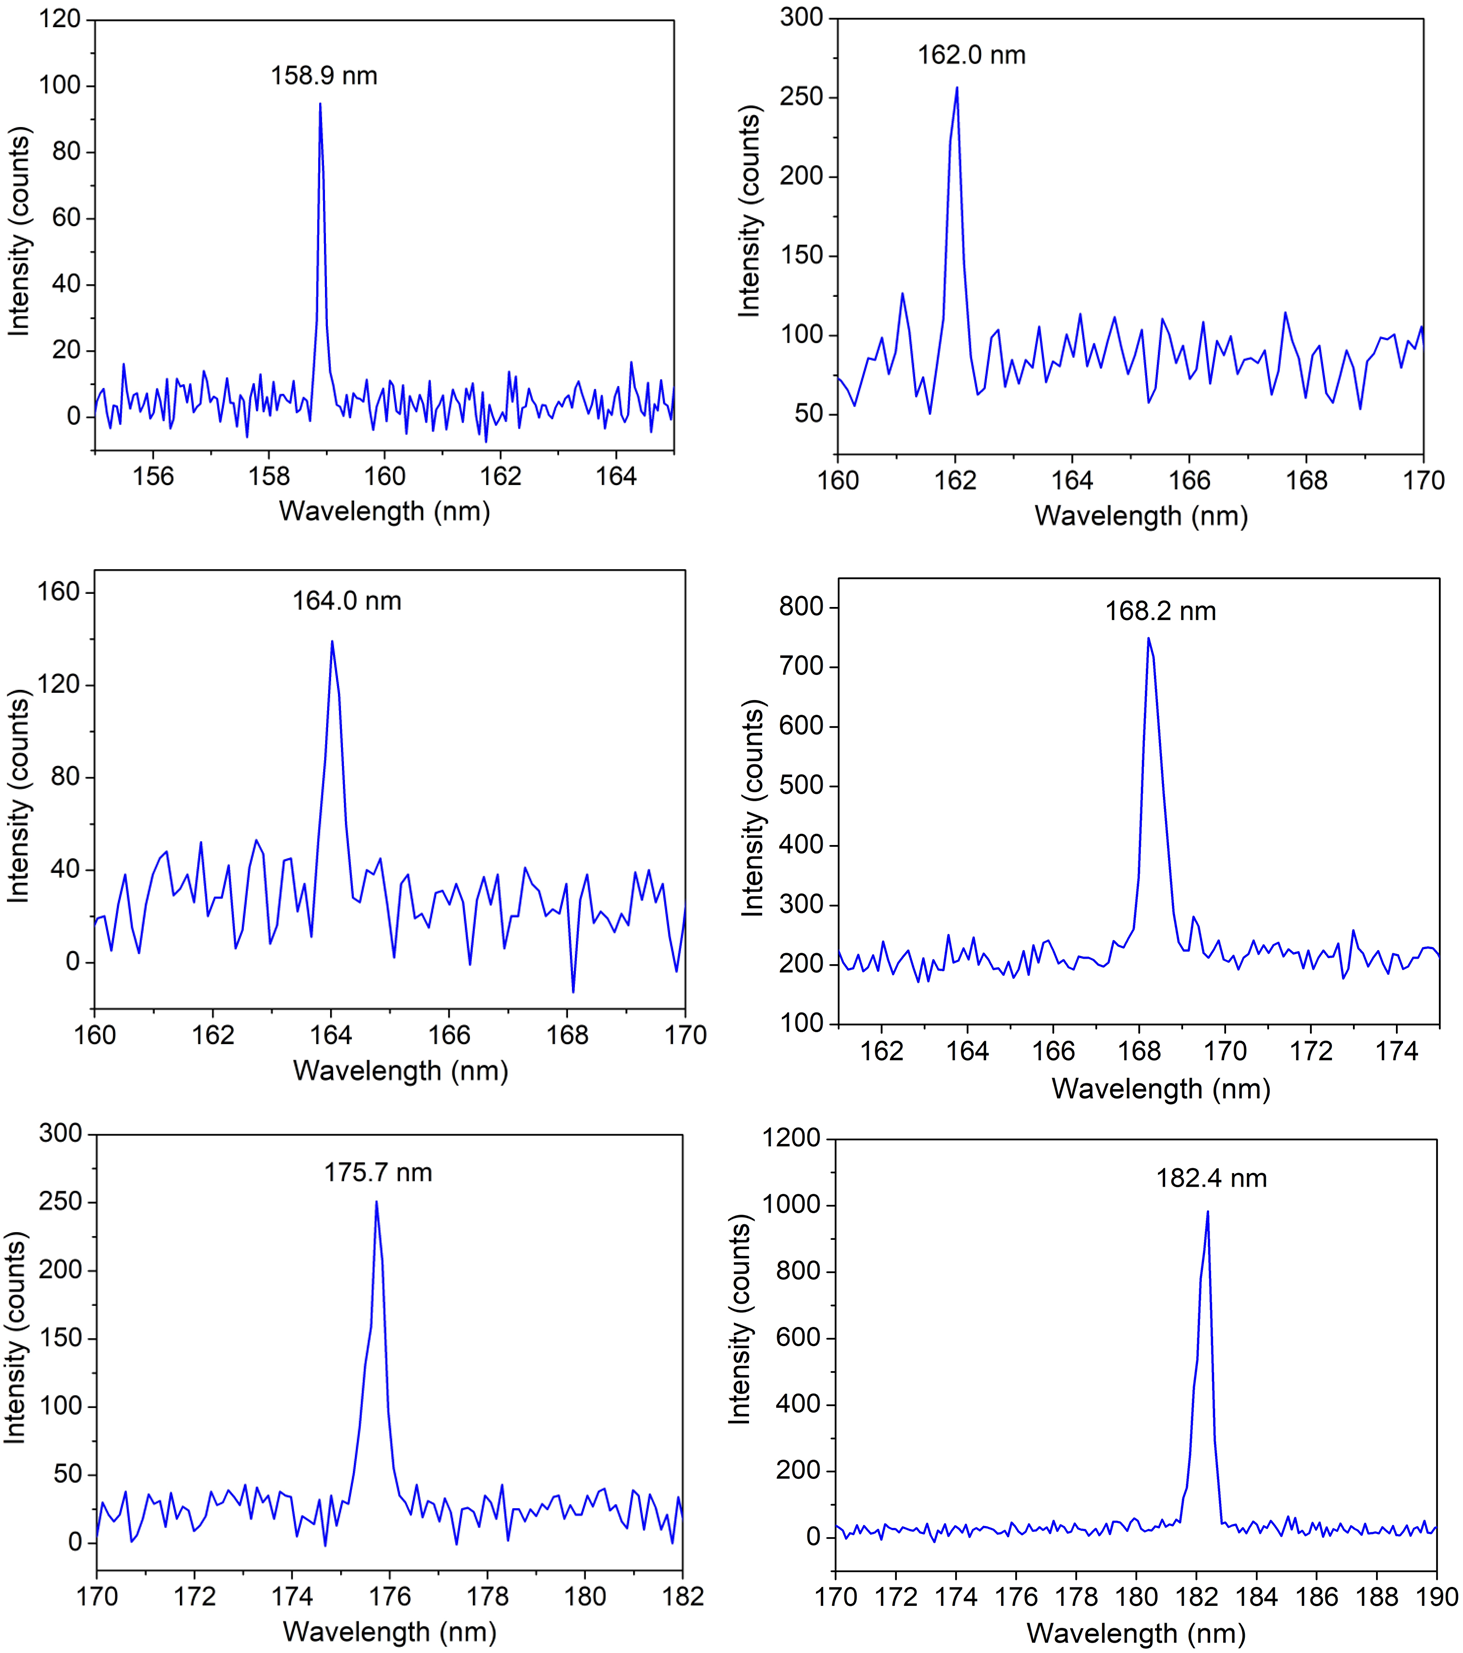

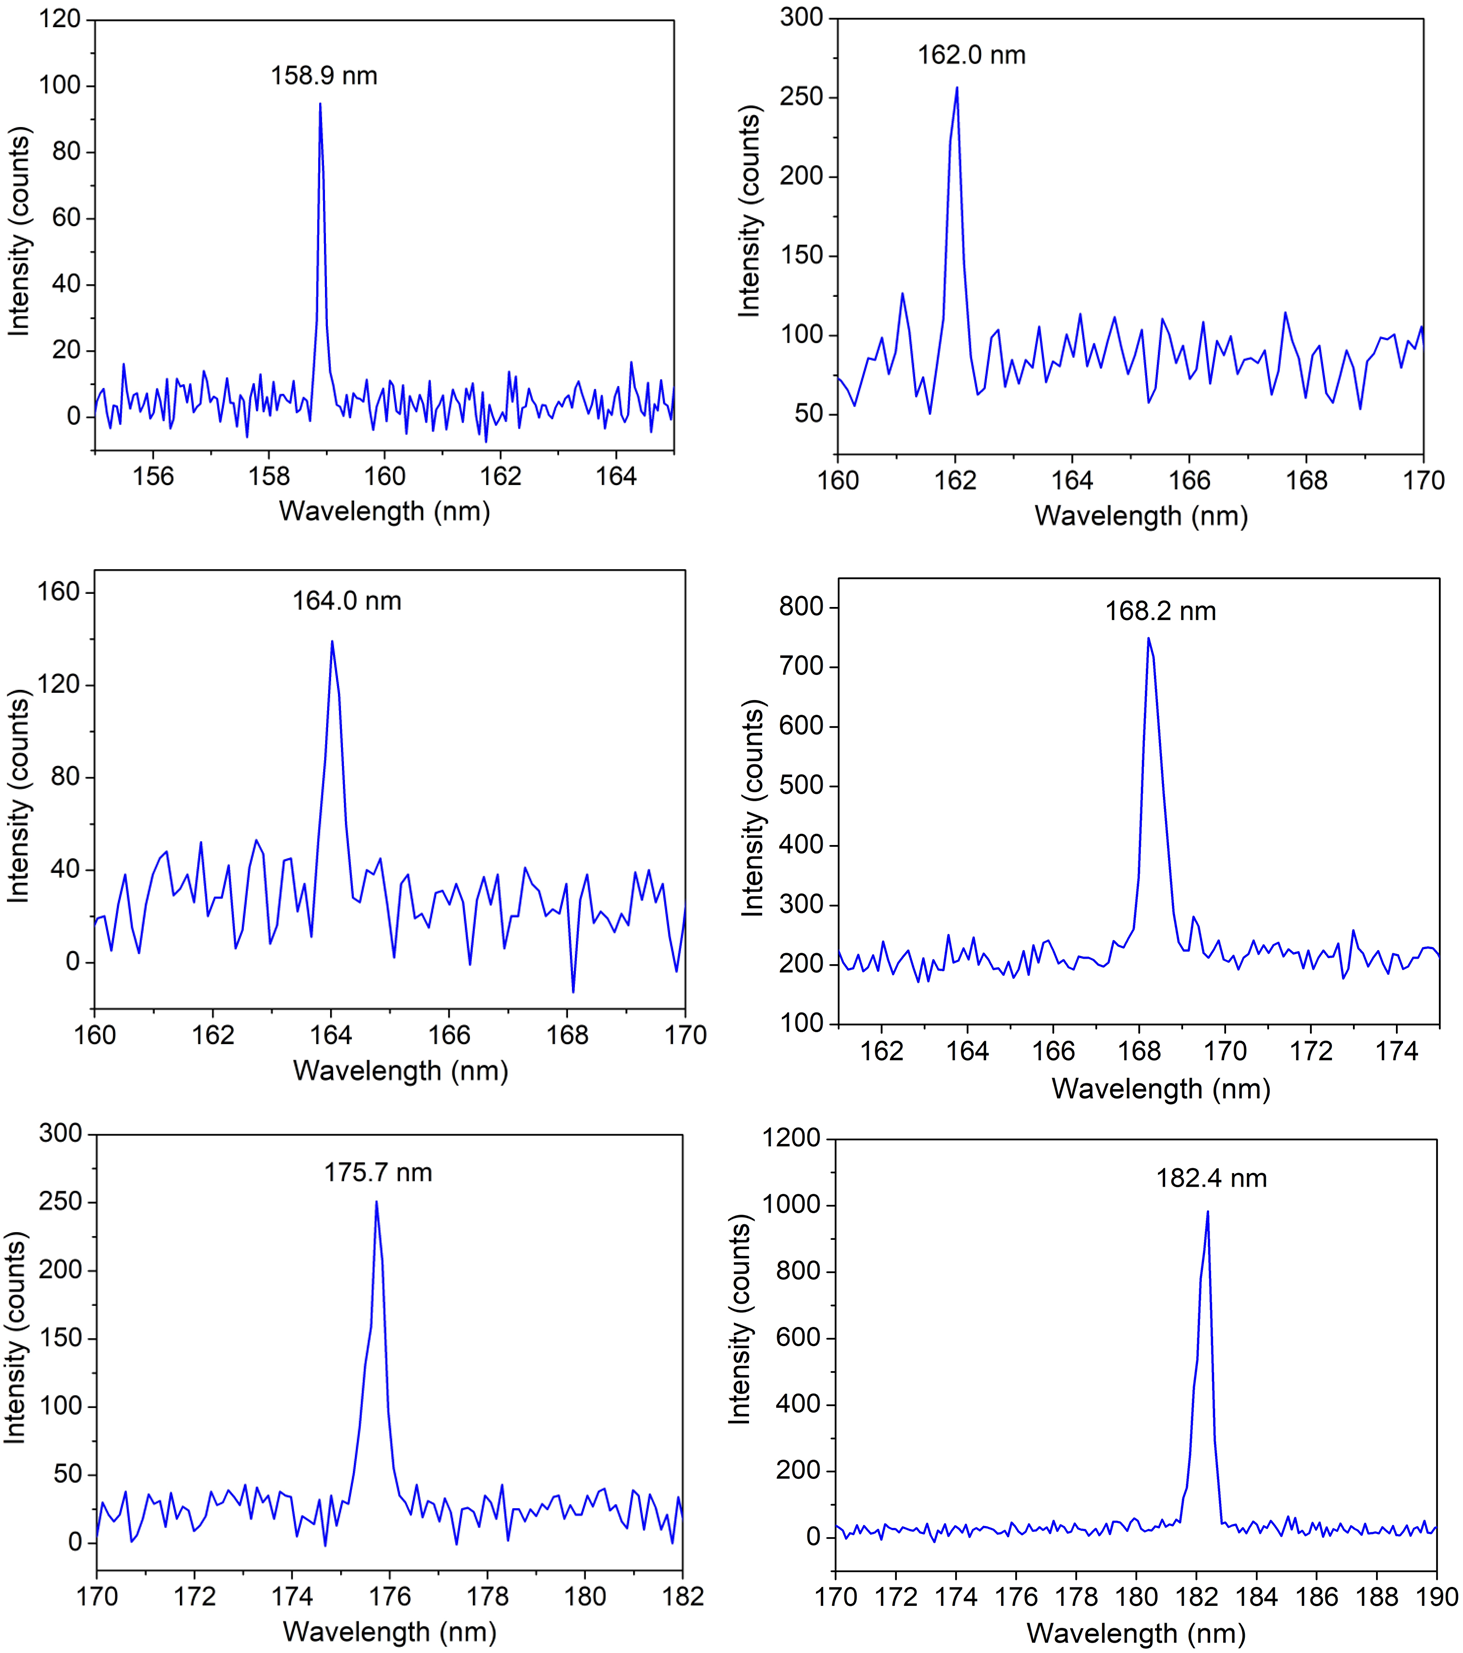
**

**
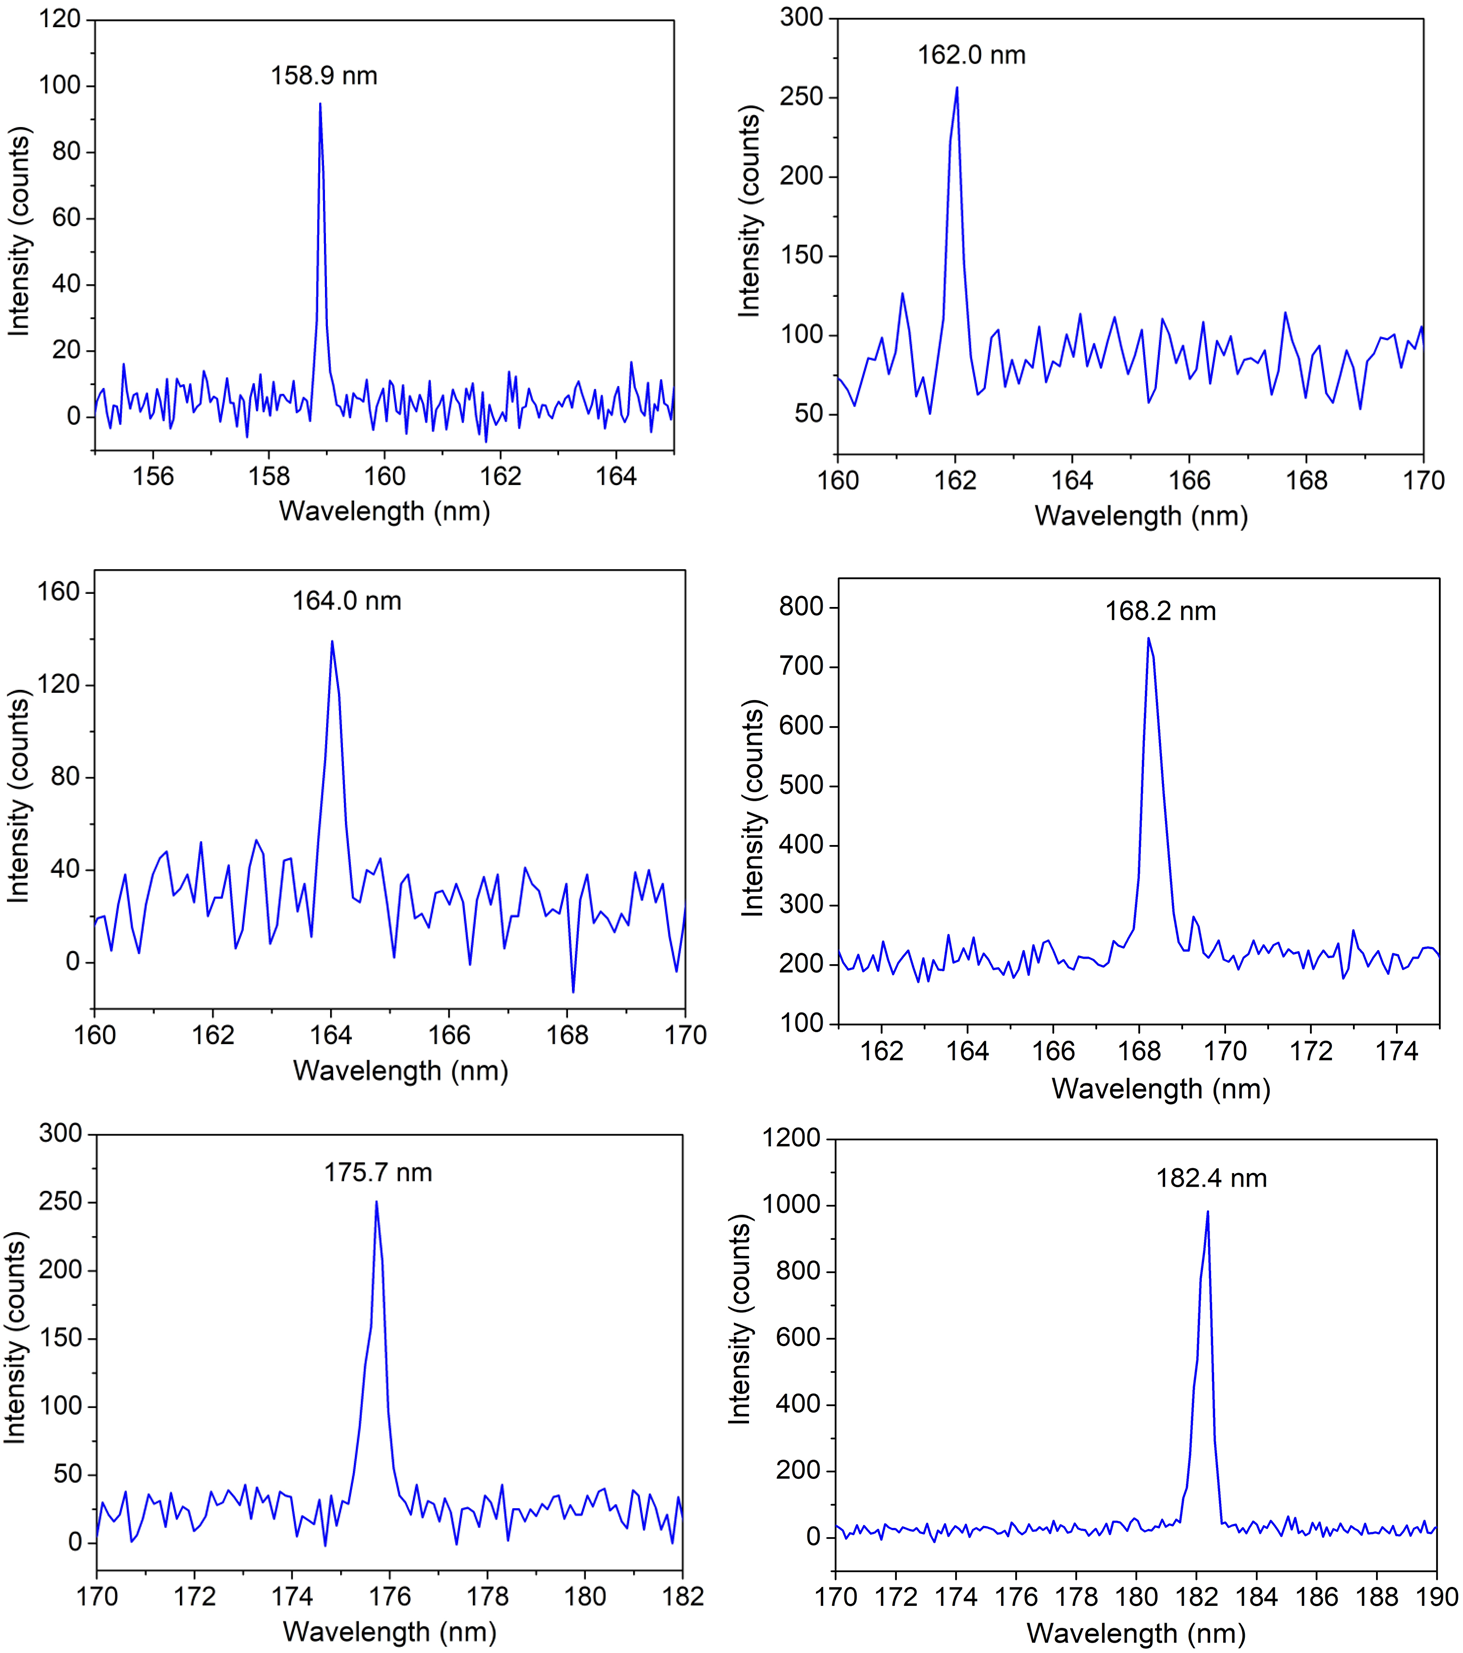
**

**
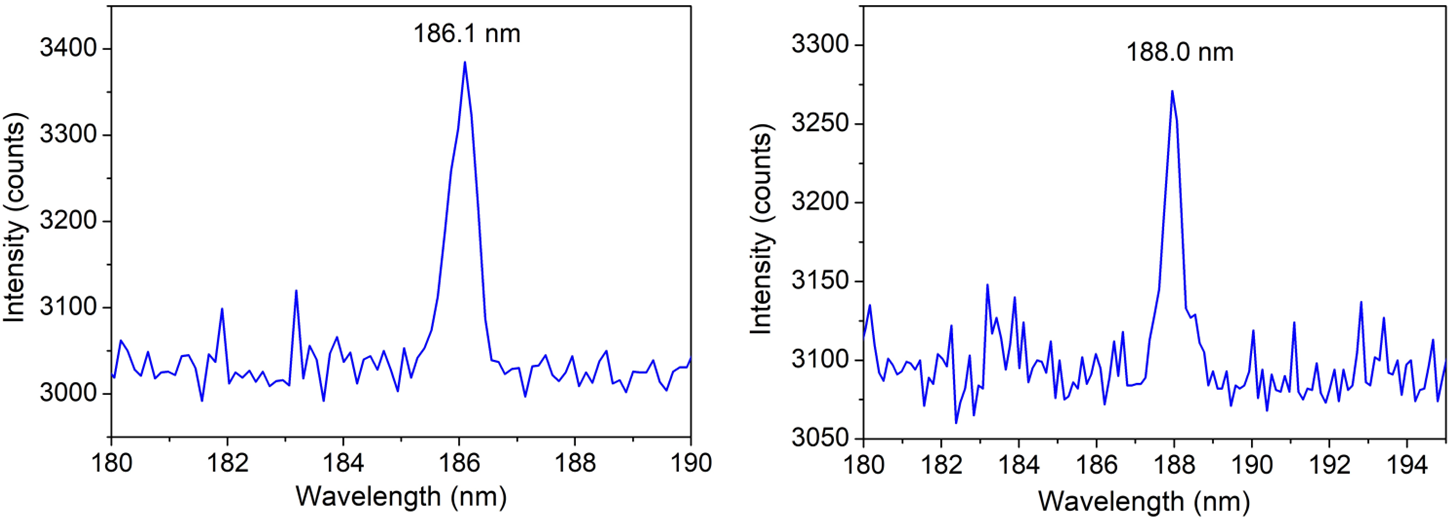
**

**Extended Data Fig. 4. Observation of frequency doubling light for 190.4-230.5 nm using the ABF device with (*θ*, *φ*) = (0 °, 40 °).** The red dotted line highlights breaking through the "200nm wall". Note that the SHG intensity is normalized for a better version and the raw data are available in Extended Data Fig. 5.

**
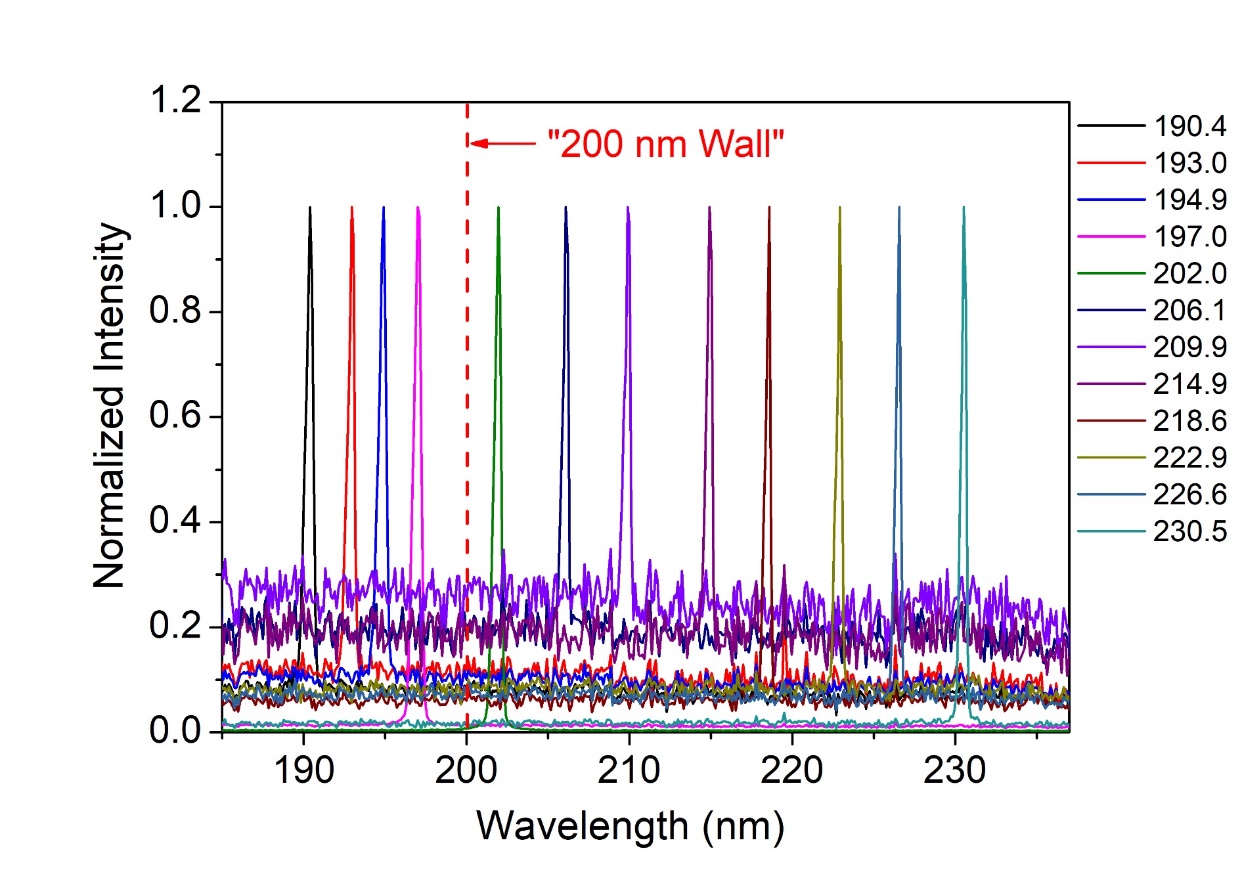
**

**Extended Data Fig. S5. Raw data of frequency doubling light for 190.4-230.5 nm using the ABF device with (*θ*, *φ*) = (0 °, 40 °).**

**
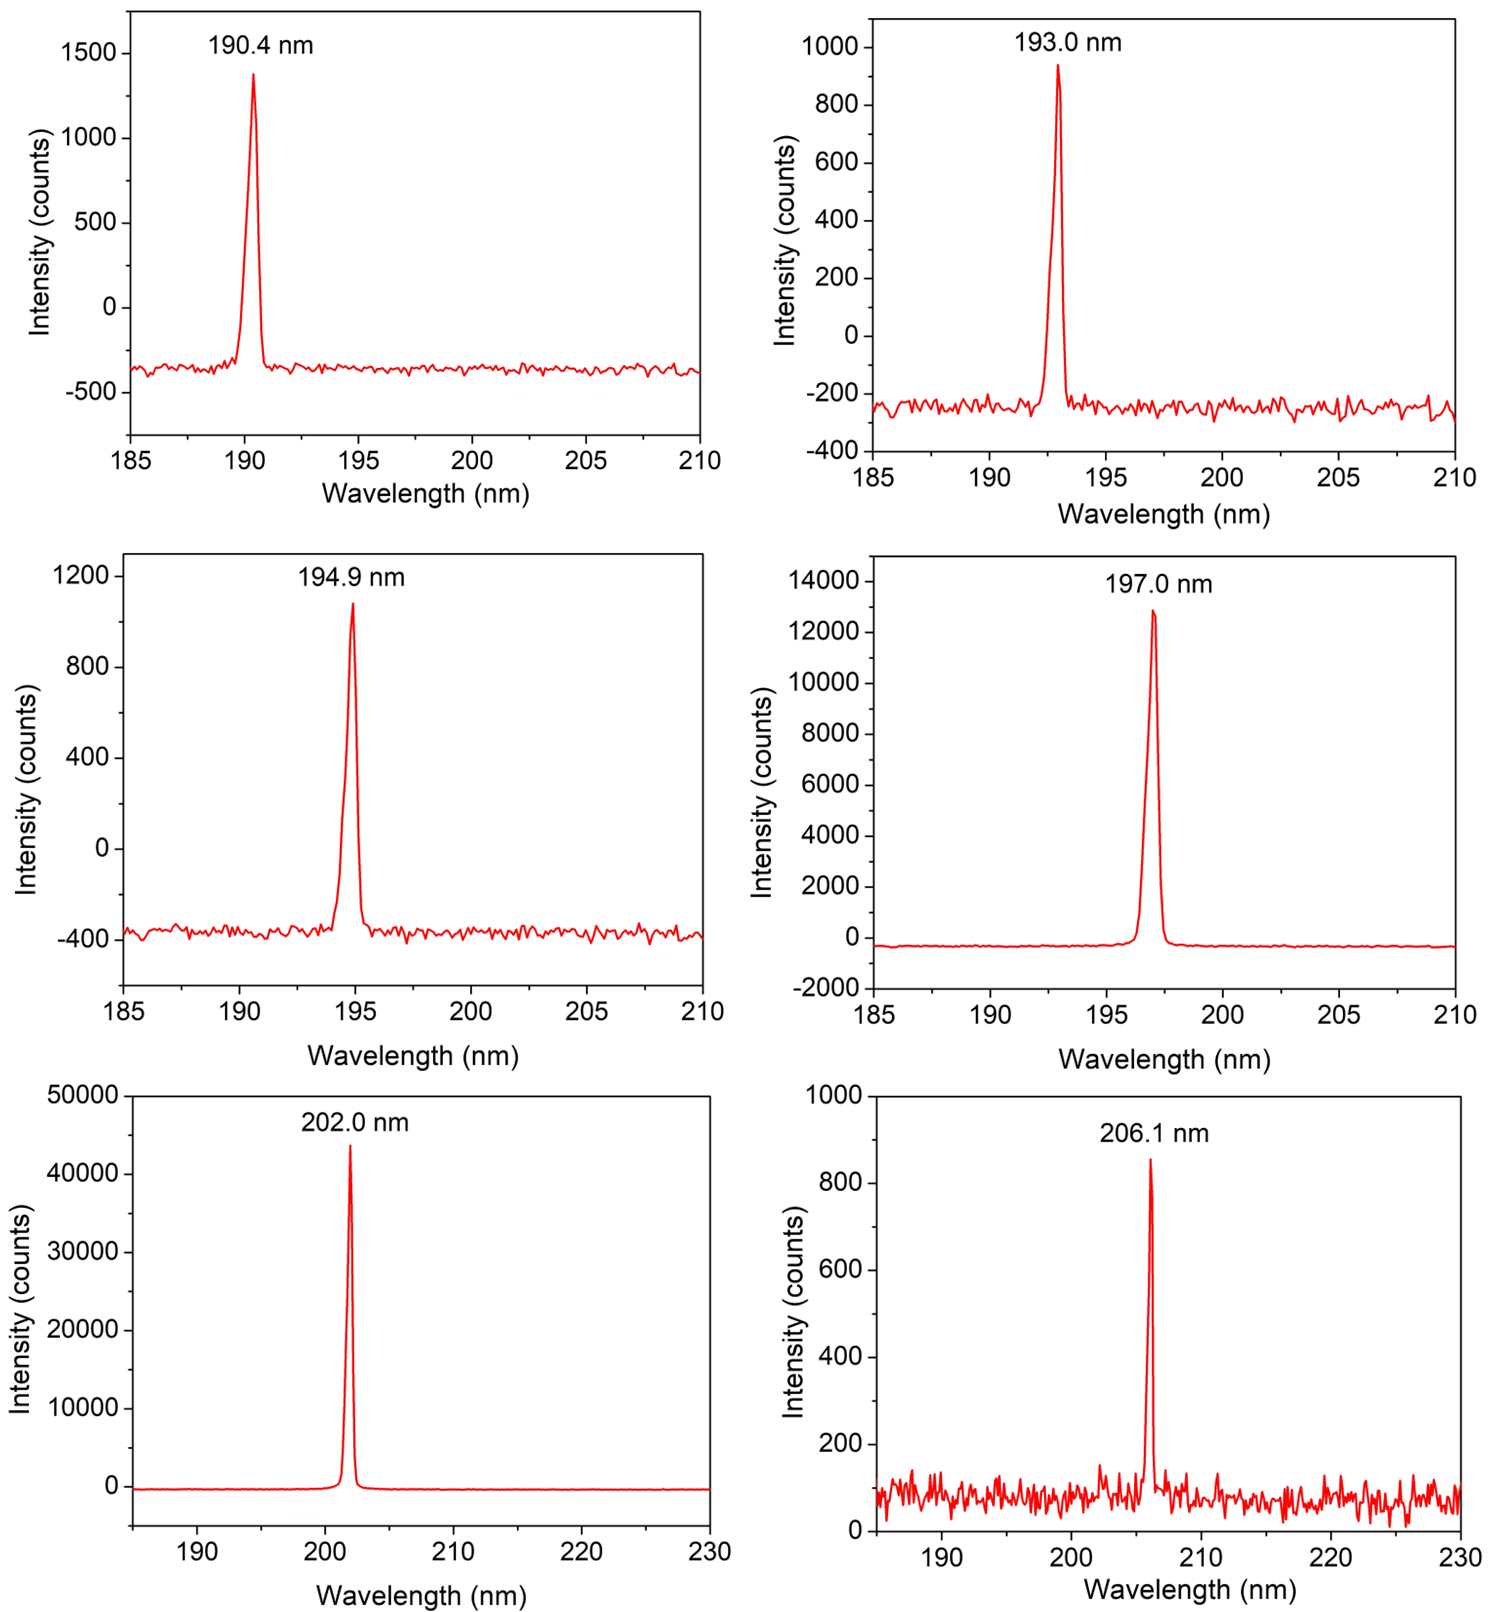

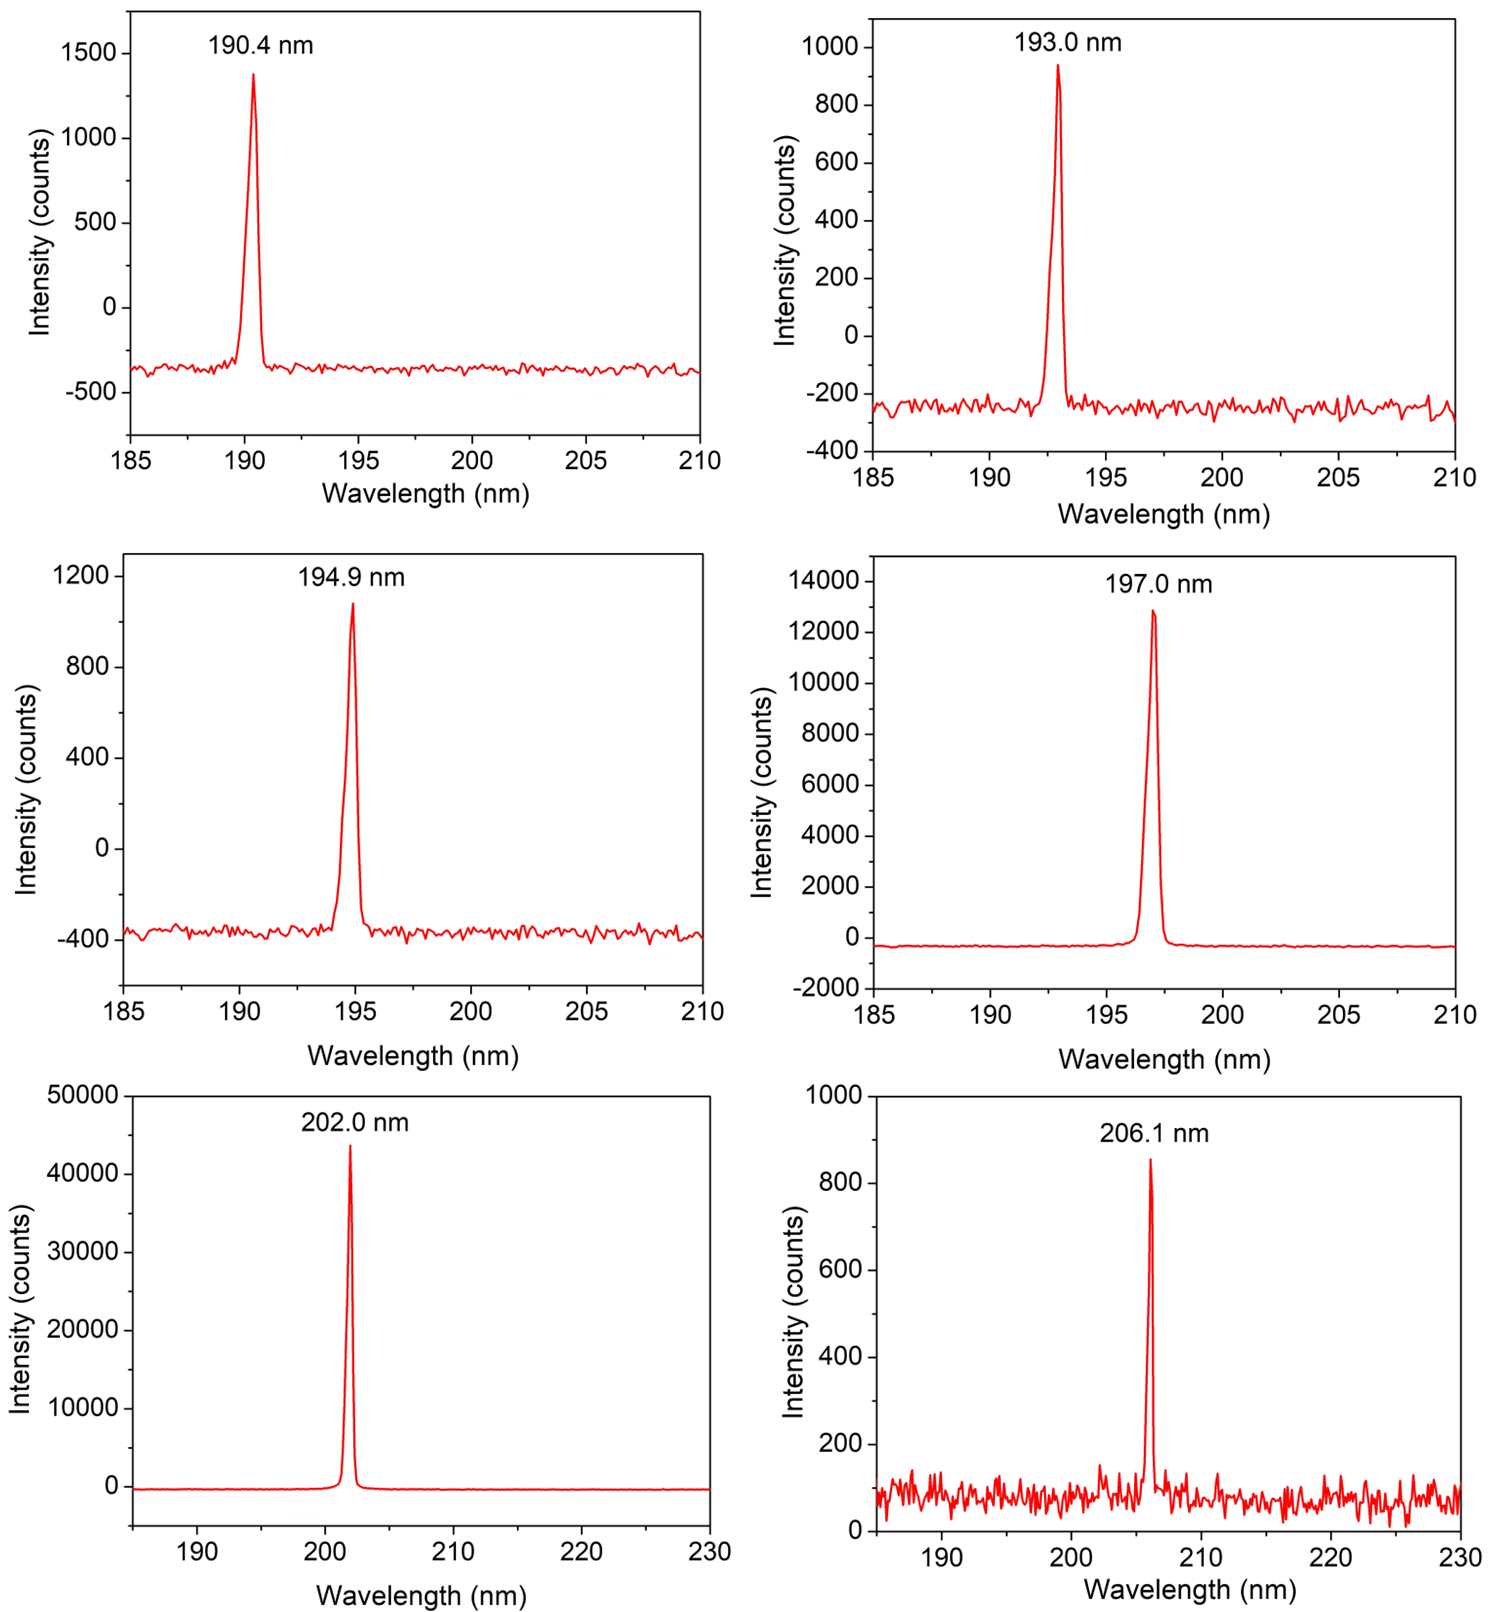

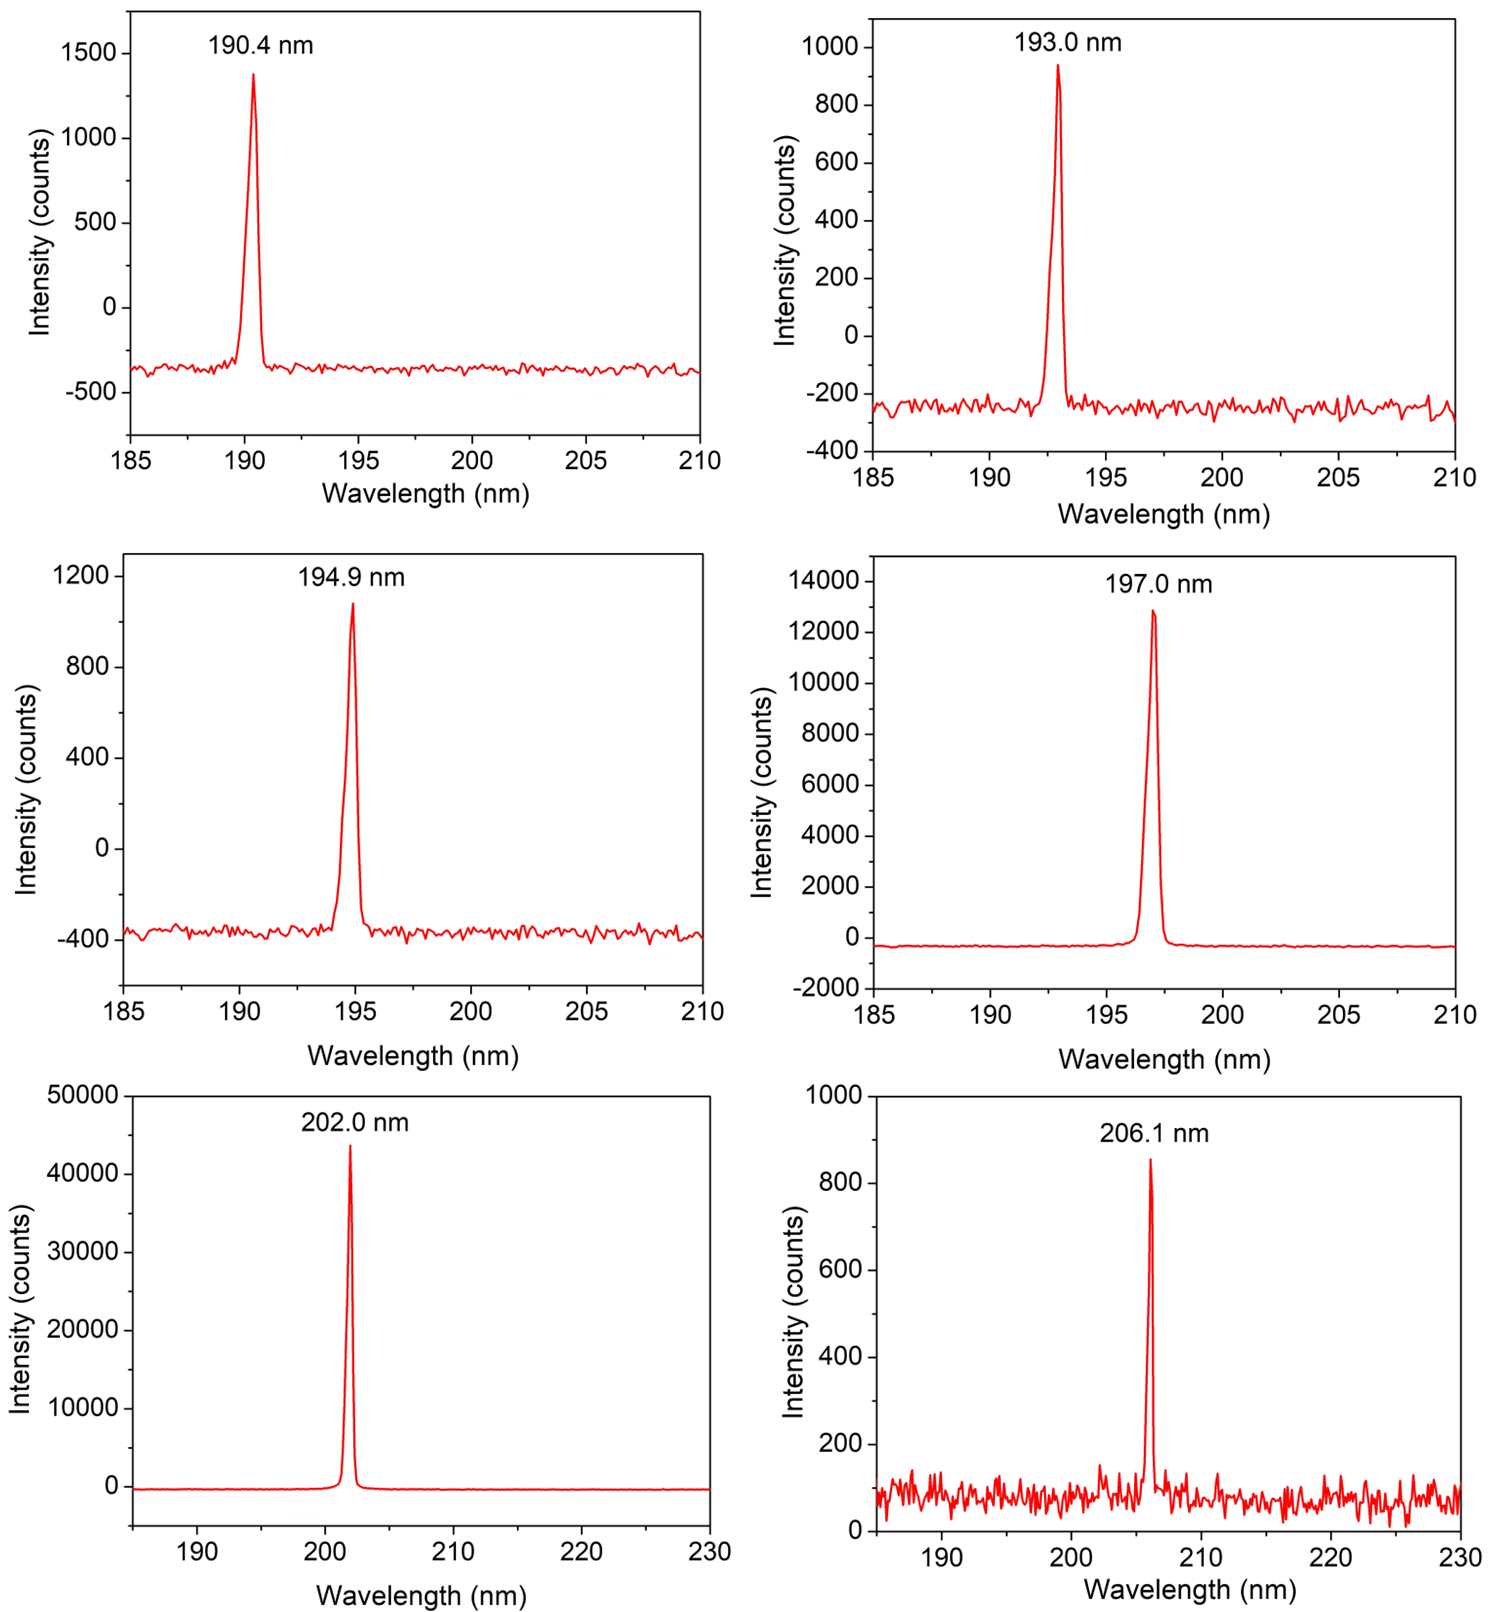

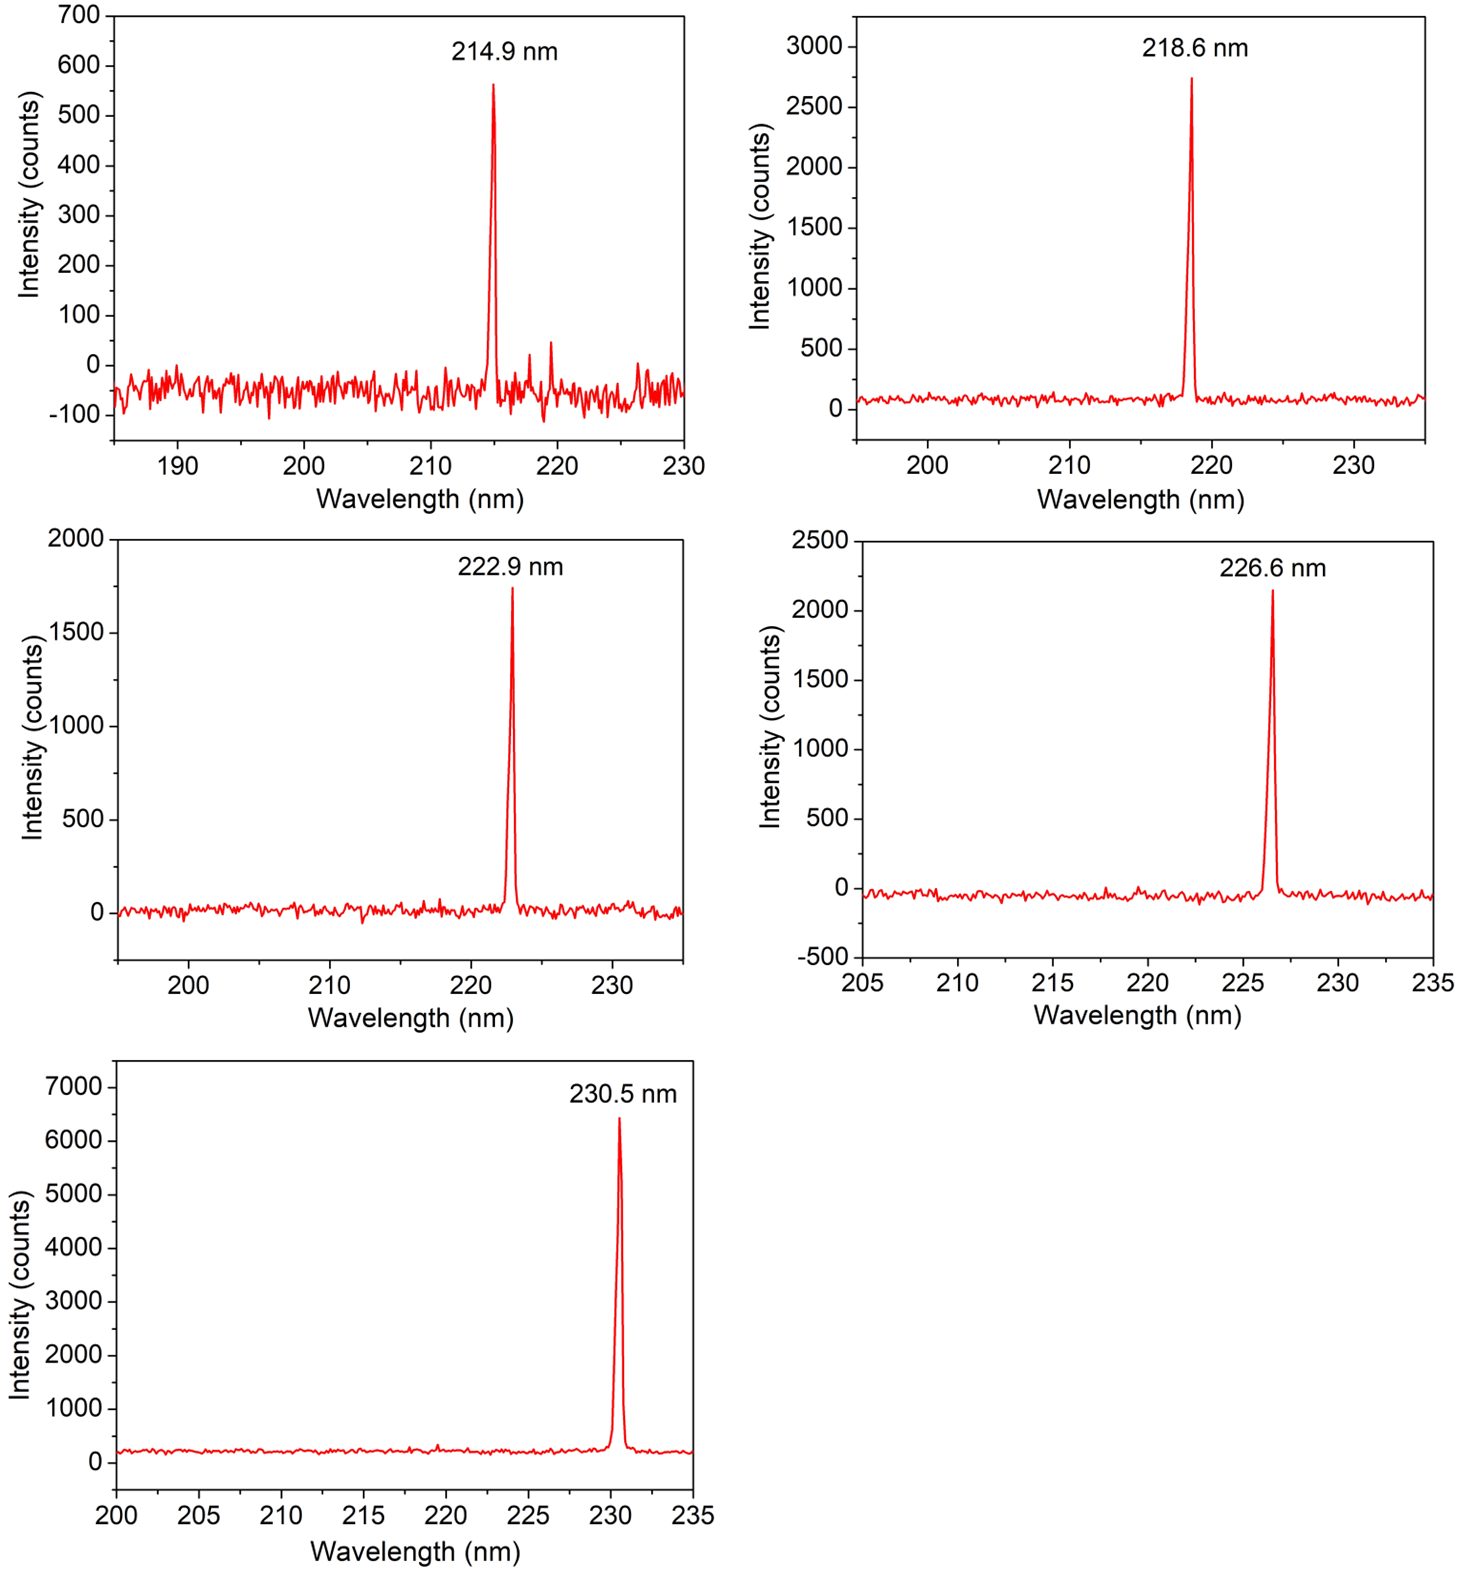

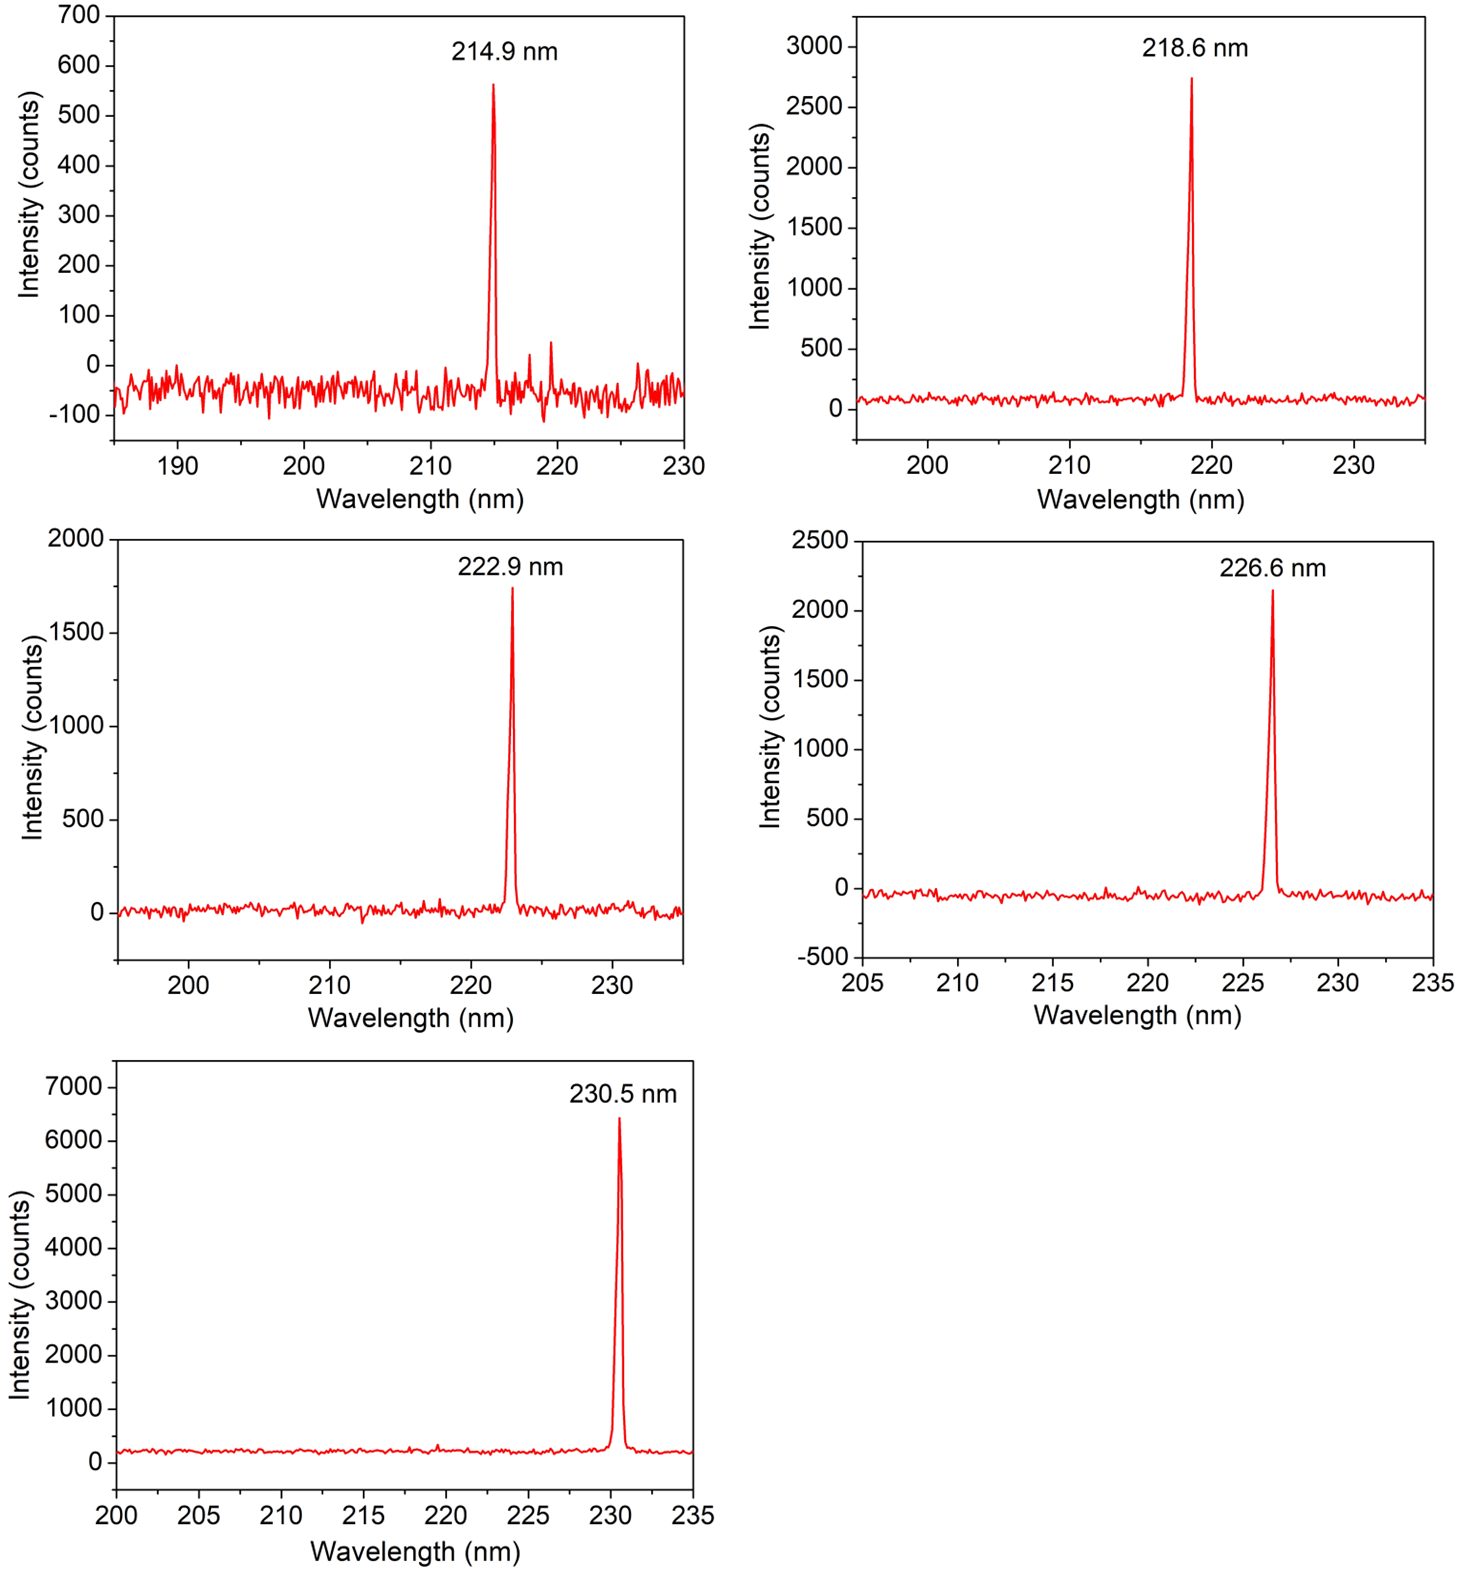
**

**
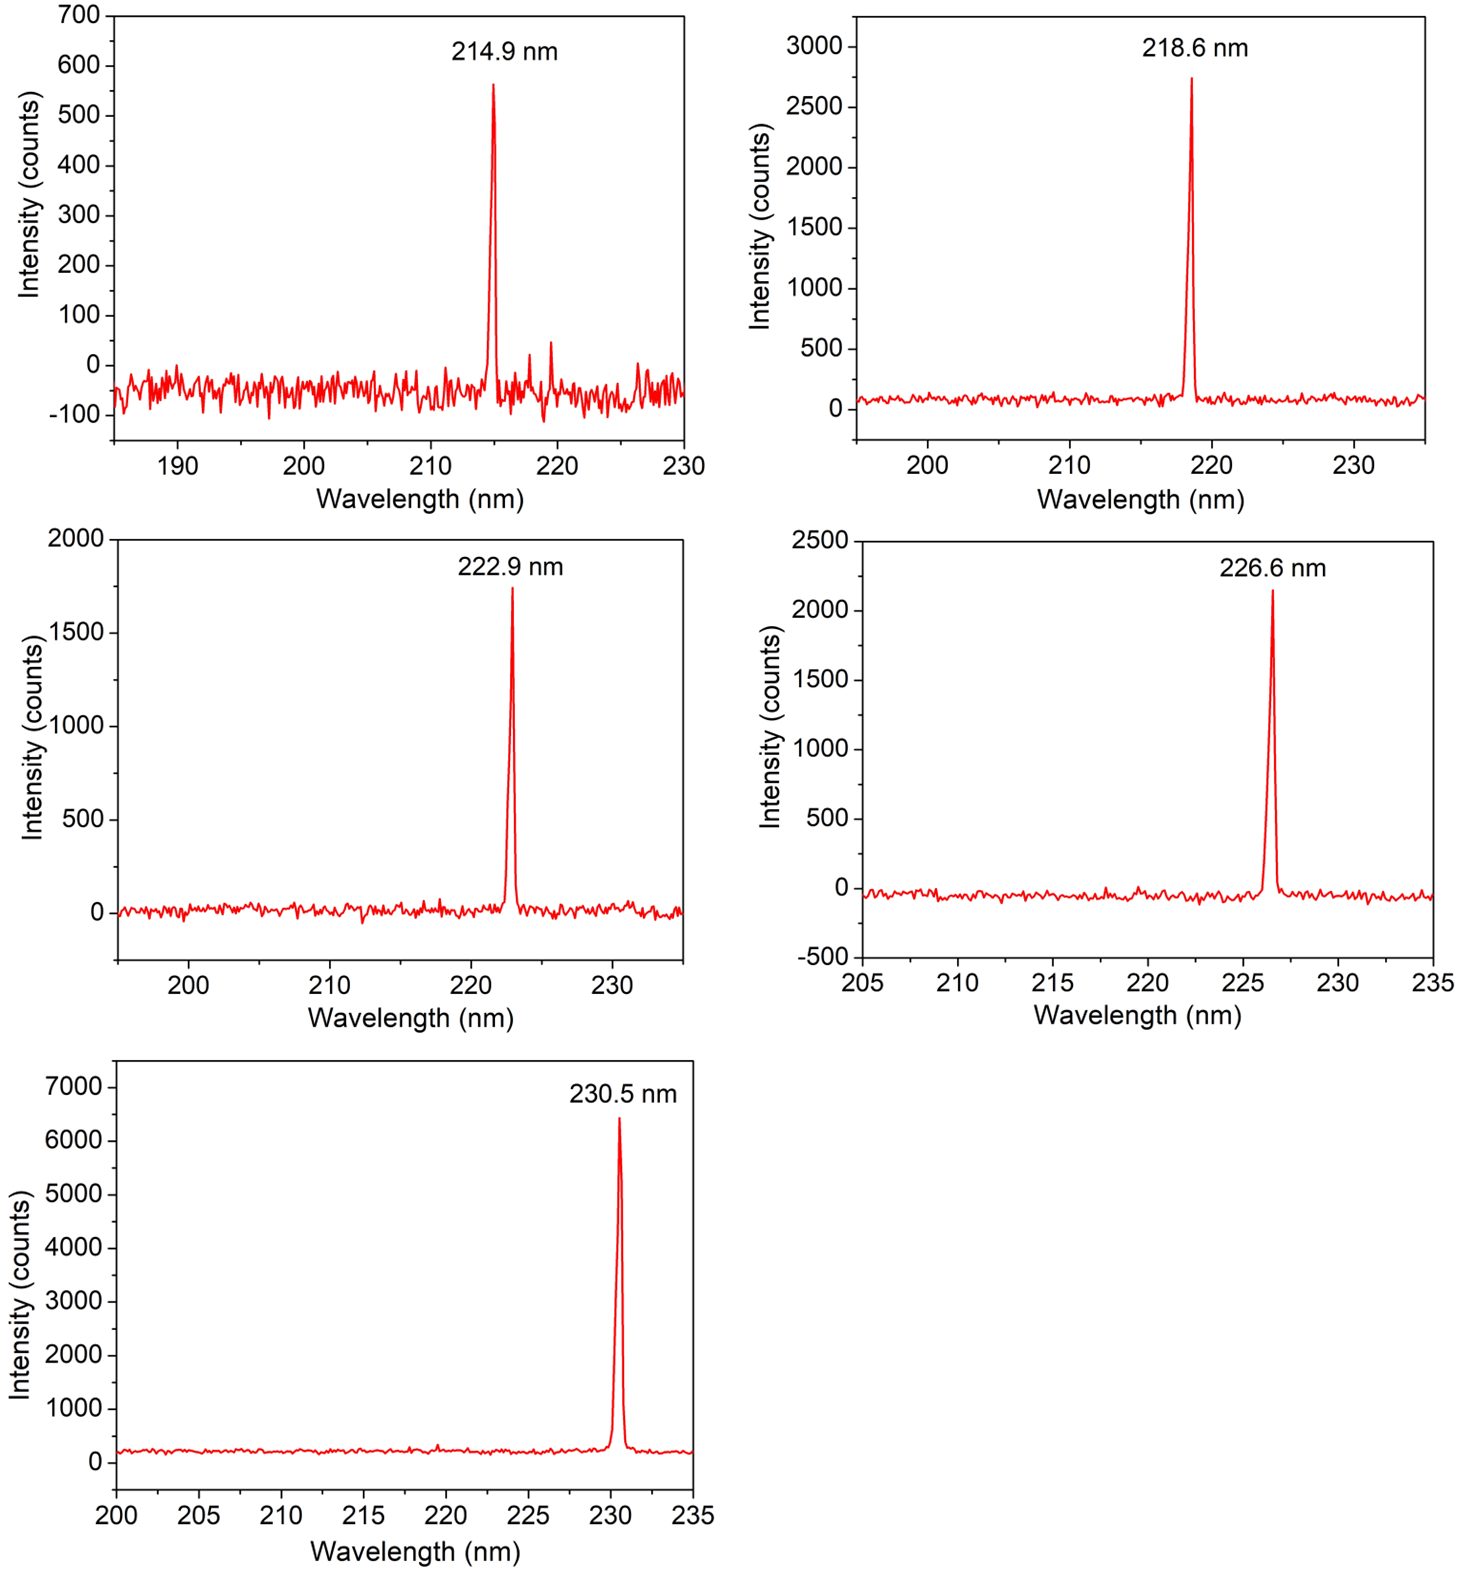
**

**Extended Data Fig. 6** **Observation of frequency doubling light from 255.1-340.2 nm using the ABF device with (*θ*, *φ*) = (0 °, 90 °)**. Note that the SHG intensity is normalized for a better version and the raw data are available in Fig. S7. Both fundamental and SHG lights are shown.

**
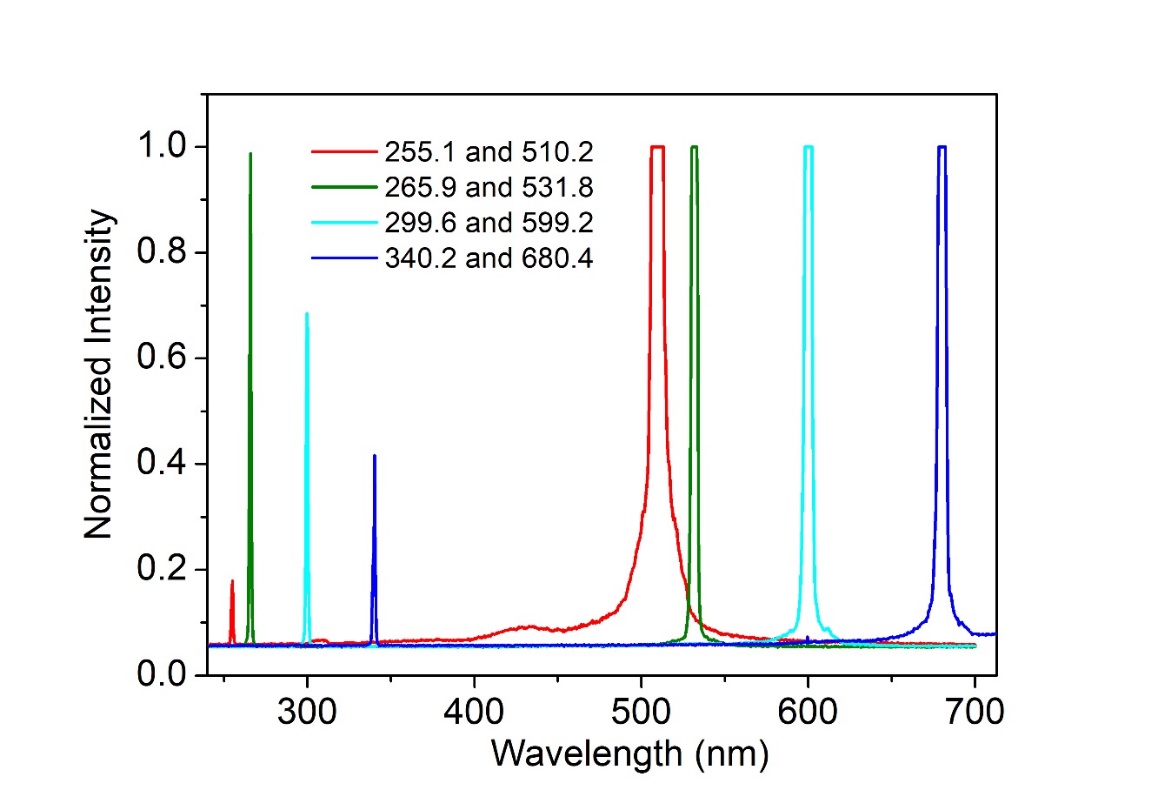
**

**Extended Data Fig. 7. Raw data of frequency doubling light for 255.1-340.2 nm using the ABF device with (*θ*, *φ*) = (0 °, 90 °).** Both fundamental and SHG lights are highlighted by dot lines in the figures.

**
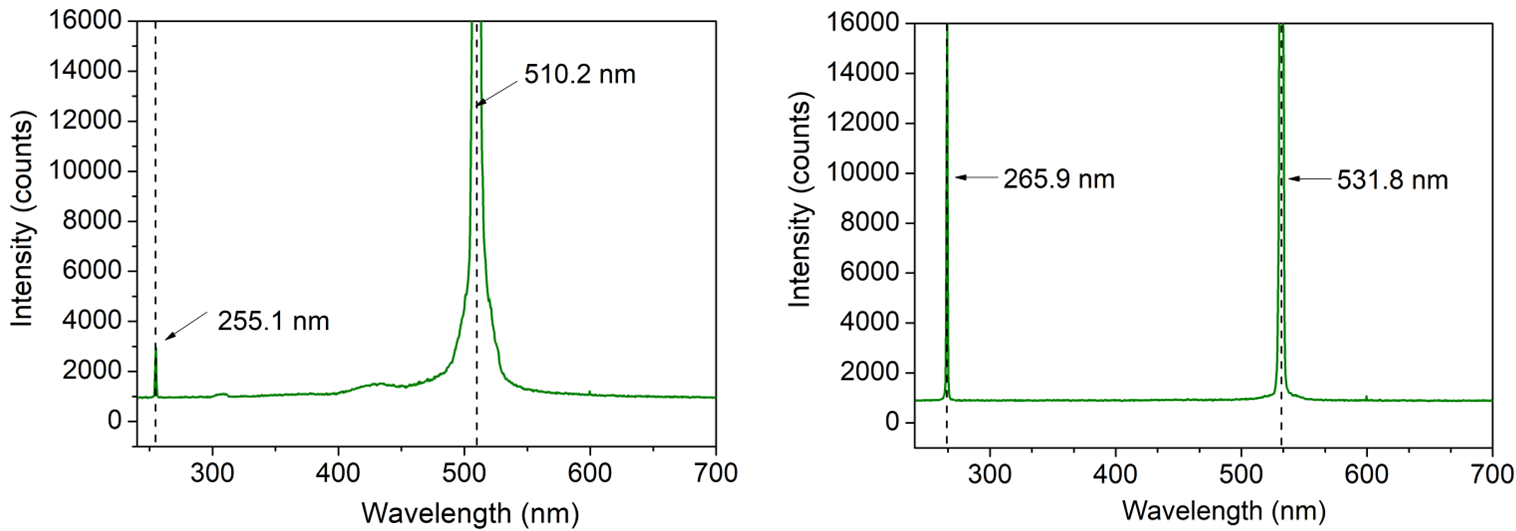

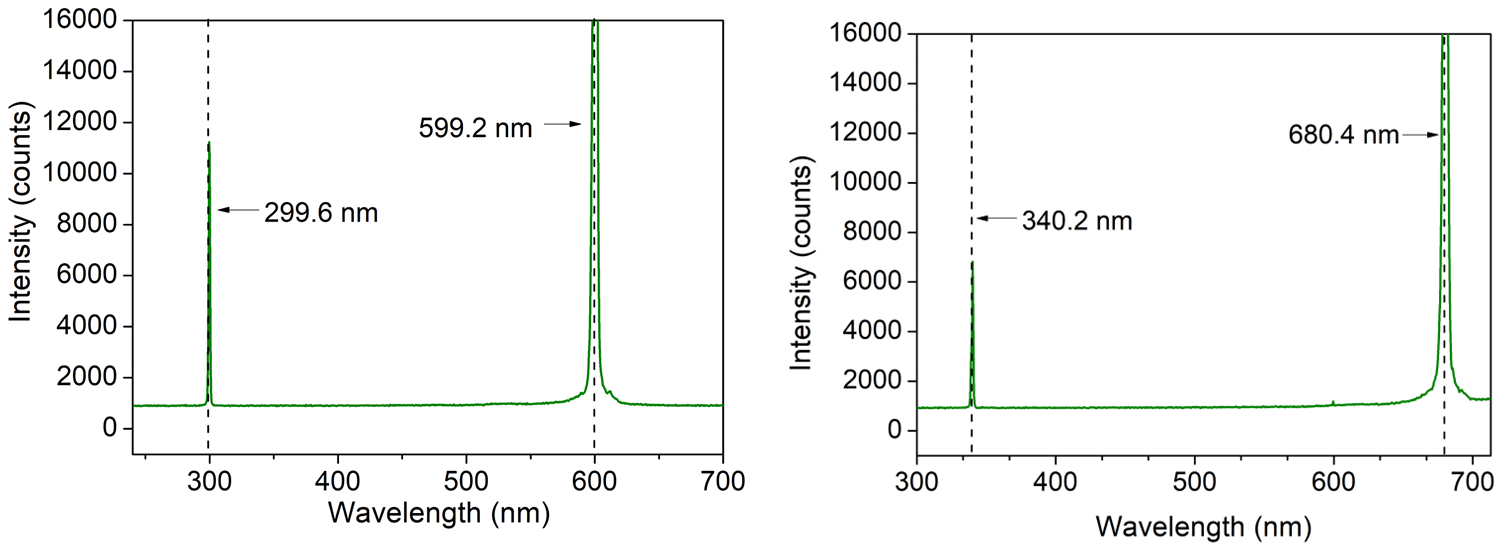
**

Extended Data Table. 1. Calculated effective SHG coefficients tensor (pm V–1) and contribution of orbitals in the SHG coefficient *d*32 of ABF.

| **Interaction orbitals** | **Contribution** |
| --- | --- |
| NH4-related orbitals (including hydrogen bond interaction orbital) | – 0.229 pm V–1  (23 %) |
| Boron and oxygen/fluorine related orbitals | – 0.773 pm V–1  (77 %) |
| Sum | – 1.002 pm V–1 |
